# Supplementary material
Source: PubMed Central journal article supplement (PMC10719740)
Supplement: EIJ-D-23-00465_Danenberg_SD.pdf [file EIJ-D-23-00465_Danenberg_SD.pdf]

## **Supplementary data**

### **Supplementary Appendix 1. Exclusion criteria for the CAPTIS first-in-human trial.**

History of stroke or transient ischemic attack; chronic and persistent atrial fibrillation; poor left ventricular function (EF<30%); renal failure (GFR<30 ml/min/1.73m<sup>2</sup>); excessive tortuosity or calcification of the aorta and iliac arteries; prior carotid stenting or carotid endarterectomy within the previous 6 months, an innominate, carotid, or subclavian artery with significant stenosis, ostial calcification, ectasia, dissection, or aneurysm at its ostium; neurodegenerative or other progressive neurological disease or history of significant head trauma followed by persistent neurologic deficit or known structural brain abnormalities; hemodialysis shunt, graft, or arterio-venous fistula involving the lower extremity vasculature; Blood count abnormality including white blood cell count <5,000/microliter, hemoglobin <10.0 mg/dL, platelet count <100,000/microliter, history of bleeding diathesis, coagulopathy, or conditions associated with increased thrombogenicity; hemodynamic instability requiring pharmacological or mechanical circulatory support; patients in whom hemodynamic instability is expected or at increased risk; Any surgery or procedure (including endovascular) planned for the 30 days post TAVR; Echocardiographic evidence of intracardiac or aortic mass, thrombus, or vegetation; Active or recent bacterial endocarditis; Active peptic ulcer or upper GI bleeding within the prior 3 months; A known hypersensitivity or contraindication to aspirin, heparin, bivalirudin, clopidogrel, ticagrelor, or contrast media, which cannot be adequately pre-medicated or replaced by an alternative agent; Life expectancy < 12 months due to non-cardiac co-morbid conditions; patients who refuse blood transfusion; active major psychiatric disease that prevent a conscious consent; and patients who are not appropriate for the study as determined by the investigator or the Eligibility Committee.

**Supplementary Table 1. Size and number of debris particles.**

| <b>Patient<br/>number</b>          | <b>Total<br/>number<br/>of<br/>particles</b> | <b>Particles</b>                          |                                          |                                                     | <b>Particles</b>                           |                                    |
|------------------------------------|----------------------------------------------|-------------------------------------------|------------------------------------------|-----------------------------------------------------|--------------------------------------------|------------------------------------|
|                                    |                                              | <b>All<br/>particles<br/>≥ 150<br/>µm</b> | <b>≥ 150<br/>and<br/>&lt; 500<br/>µm</b> | <b>Particles<br/>≥ 500 and<br/>&lt; 1000<br/>µm</b> | <b>≥ 1000<br/>and<br/>&lt; 2000<br/>µm</b> | <b>Particles<br/>≥ 2000<br/>µm</b> |
| 1                                  | 5898                                         | 672                                       | 574                                      | 72                                                  | 16                                         | 10                                 |
| 2                                  | 1359                                         | 99                                        | 79                                       | 11                                                  | 4                                          | 5                                  |
| 3                                  | 1400                                         | 77                                        | 68                                       | 8                                                   | 1                                          | 0                                  |
| 4                                  | 1718                                         | 132                                       | 117                                      | 13                                                  | 1                                          | 1                                  |
| 5                                  | 1037                                         | 57                                        | 52                                       | 5                                                   | 0                                          | 0                                  |
| 6                                  | 1661                                         | 69                                        | 62                                       | 4                                                   | 3                                          | 0                                  |
| 7                                  | 608                                          | 20                                        | 15                                       | 2                                                   | 2                                          | 1                                  |
| 8                                  | 1679                                         | 99                                        | 87                                       | 9                                                   | 1                                          | 2                                  |
| 9                                  | 370                                          | 14                                        | 13                                       | 1                                                   | 0                                          | 0                                  |
| 10                                 | 1425                                         | 105                                       | 79                                       | 9                                                   | 8                                          | 9                                  |
| 11                                 | 1712                                         | 137                                       | 123                                      | 11                                                  | 2                                          | 1                                  |
| 12                                 | 611                                          | 42                                        | 25                                       | 8                                                   | 8                                          | 1                                  |
| 13                                 | 782                                          | 41                                        | 30                                       | 7                                                   | 1                                          | 3                                  |
| 14                                 | 2443                                         | 109                                       | 81                                       | 11                                                  | 9                                          | 8                                  |
| 15                                 | 895                                          | 35                                        | 33                                       | 2                                                   | 0                                          | 0                                  |
| 16                                 | 1199                                         | 86                                        | 79                                       | 5                                                   | 2                                          | 0                                  |
| 17                                 | 525                                          | 74                                        | 52                                       | 10                                                  | 10                                         | 2                                  |
| 18                                 | 1268                                         | 153                                       | 130                                      | 19                                                  | 1                                          | 3                                  |
| 19                                 | 1069                                         | 103                                       | 85                                       | 10                                                  | 8                                          | 0                                  |
| 20                                 | 1305                                         | 121                                       | 106                                      | 10                                                  | 4                                          | 1                                  |
| Average<br>number                  | 1448                                         | 112                                       | 95                                       | 11                                                  | 4                                          | 2                                  |
| Percentage<br>of average<br>number | -                                            | 100%                                      | 84.2%                                    | 10.1%                                               | 3.6%                                       | 2.1%                               |
| Median<br>[1st-3rd<br>quartile]    | 1287<br>[810-<br>1675]                       | 93<br>[46-118]                            | 79<br>[38-101]                           | 9<br>[5-11]                                         | 2<br>[1-8]                                 | 1<br>[0-3]                         |
